# Supplementary material
Source: Elsevier journal article supplement (https://www.sciencedirect.com/science/article/pii/S0213911118302413)
Supplement: mmc1 [file S0213911118302413:mmc1.docx]

**Apéndice**

**Tabla I**

Principales resultados del estudio agrupados por dimensiones

| Resultados | | Periodo 1 | Periodo 2 |
| --- | --- | --- | --- |
| *Bloque 1: Acceso al sistema sanitario* | | | |
| Entrada al sistema | Hay poco conocimiento sobre el sistema y su funcionamiento |  |  |
| La falta de información como barrera |  |  |
| Fuerte vinculación del acceso al sistema sanitario a través de la Tarjeta Sanitaria Individual (TSI); no tener la TSI se considera una barrera |  |  |
| Personas sin TSI o TSI pasiva, miedo a cobro y no atención |  |  |
| Provisión de información de entrada al sistema | Familia y red social como principales fuentes de información, basada fundamentalmente en el boca a boca |  |  |
| Emergen los medios de comunicación, sobre todo la televisión |  |  |
| Poca información desde las instituciones |  |  |
| Conocimiento asociado a seguridad y tranquilidad |  |  |
| El desconocimiento genera miedo y creencia de pérdida de acceso al sistema |  |  |
| Las personas de origen boliviano son las que aparecen como mejor informadas (fuerte tejido asociativo y fuentes institucionales consolidadas, como p. ej. el consulado) |  |  |
| Trámites para la obtención de la TSI | Trámites y requisitos de obtención de TSI se percibe en general como un proceso sencillo, salvo alguna excepción concreta |  |  |
| Los trámites, en general, se hacen a través de una solicitud en el centro de salud, como beneficiario de un familiar, o a través de alguna organización, principalmente Cruz Roja |  |  |
| *Bloque 2: Acceso a los servicios sanitarios* | | | |
| Entrada a los servicios | TSI como elemento fundamental |  |  |
| Mejora el acceso con TSI pasiva |  |  |
| No tener TSI puede generar cobros o desvío en el acceso al sistema (urgencias) |  |  |
| Aparecen dificultades de acceso a los servicios en los tres colectivos |  |  |
| La información sobre la entrada a los servicios proviene de fuentes familiares y de red social; las redes sociales fuente emergente |  |  |
| Papel de las asociaciones y ONG como fuentes principales de información |  |  |
| Volumen y distribución de los servicios | Disminución de infraestructuras y equipos, sobre todo según las personas bolivianas y rumanas |  |  |
| Disminución de la plantilla en atención hospitalaria, falta de sustituciones en atención primaria y reducción de descuentos aplicados a los medicamentos (esto último según personas marroquíes y rumanas) |  |  |
| Accesibilidad física a los servicios | La percepción sigue siendo que los centros de salud son más cercanos que los hospitales |  |  |
| Relación directa entre la distancia y el gasto |  |  |
| El transporte público se considera insuficiente |  |  |
| Accesibilidad organizativa o entrada a los servicios | Entrada por urgencias por las dificultades asociadas a las citas |  |  |
| Entrada por urgencias por recomendación de los propios servicios |  |  |
| La dificultad en interpretación que se hace del RDL por parte de los diferentes profesionales genera variabilidad en la atención |  |  |
| Horarios de atención | Dificultad por falta de consultas en horario de tarde (en el primer periodo se interpreta como demanda y en el segundo como recorte) |  |  |
| Incompatibilidades del horario de atención con trabajo o familia |  |  |
| Reducción de horas de atención |  |  |
| Tiempos de espera | Percibido como uno de los principales hándicaps del sistema |  |  |
| Ha empeorado, sobre todo en el servicio de urgencias |  |  |
| Impacto en la salud |  |  |
| Reorientación de atención primaria al servicio de urgencias |  |  |
| Pagos por consultas, medicinas o tratamientos | Miedo a pago por medicamentos o por facturación por la consulta |  |  |
| Agravamiento de la accesibilidad a medicamentos por las condiciones económicas de las personas entrevistadas y por la salida o la modificación de financiación de algunos medicamentos |  |  |
| Pagos relacionados, como transporte, gestiones por terceros, documentos, etc. |  |  |
| *Bloque 3: Factores relacionados con la condición o situación de las personas entrevistadas* | | | |
| Factores que relacionan acceso y condiciones o situaciones en las que se encuentran las personas entrevistadas | Relación entre el trabajo y la asistencia sanitaria: problemas de falta de tiempo, incompatibilidad de horarios o permisos laborales necesarios |  |  |
| El desempleo se percibe como la principal barrera para la atención sanitaria |  |  |
| Los recursos económicos afectan, pero no determinan, el acceso a la atención sanitaria |  |  |
| En general, el contexto social, económico, político y laboral ha empeorado |  |  |
| La situación administrativa se relaciona con la facilidad o dificultad de acceso |  |  |
| Se enfatizan más la importancia del idioma en la mejora del acceso y el trato que se recibe en los centros sanitarios |  |  |
| Miedos y percepciones de dificultad de acceso | El miedo se vincula frecuentemente a la situación administrativa irregular |  |  |
| La publicación del RDL 16/2012 y la aplicación de algunas reformas de ámbito estatal hacen que se centre en la situación administrativa y laboral de las personas el acceso efectivo o no a la atención sanitaria |  |  |
| La familia y las redes sociales | El miedo a no recibir atención médica genera que se deje de acudir a los servicios |  |  |
| Facilitadoras para el acceso y la obtención de atención sanitaria, así como para hacer frente a barreras como la del idioma |  |  |
| El retorno de algunas personas a causa de la crisis económica ha generado pérdida de red social |  |  |
| Patrón de uso | En general, se acude poco a los servicios sanitarios, cuando la dolencia es ya grave y a urgencias |  |  |
| Urgencias: por larga espera para obtención de cita en atención primaria |  |  |
| Urgencias: duda de si tienen derecho o no a la asistencia sanitaria |  |  |
| Abandono de acudir a servicios: por dificultades en el trámite, miedo a no ser atendidos o por alguna experiencia negativa anterior |  |  |
| RDL 16/2012: el desconocimiento y la variabilidad en su interpretación como barrera de acceso |  |  |
| Percepciones culturales | Las personas marroquíes y rumanas creen más en la medicina occidental, mientras que las personas bolivianas combinan esta más con la medicina tradicional |  |  |
| Autotratamiento farmacológico para problemas leves en los tres colectivos |  |  |
| Percepción de discriminación en el entorno del sistema de salud | Hay comentarios de percepción y experiencia de discriminación en los tres colectivos, y de trato desigual a personas autóctonas y personas migrantes, y a personas en situación administrativa regular e irregular |  |  |
| Discursos de no discriminación |  |  |
| Importancia de la exclusión de las personas migrantes de la atención sanitaria que podría tener consecuencias en la prevención y la detección temprana de algunas enfermedades |  |  |

**Tabla II**

Citas literales

| Resultados | Fase 1 | Fase 2 |
| --- | --- | --- |
| *Bloque 1: Acceso al sistema sanitario* | | |
| Entrada al sistema | Provisión de información  *“Me he enterado un poco más, algo. Sí, porque cuando llegué yo no sabía nada pero ya por lo menos sé un poco más y todo eso. [E. ¿Y cuáles han sido las fuentes de información para este conocimiento?] El boca a boca de las personas.”* Mujer Bolivia Fase PRE  *“Sí, yo conforme que ha pasado el tiempo y he tenido más contactos y sabido más y estoy más informada y tengo más manejo de todo. Me siento con más libertad de ir, con más tranquilidad y con más derecho incluso.”* Mujer Rumanía Fase PRE  *“Sí por ejemplo gestionar la cita… [E. Exacto, de donde ha sacado esa información, quien le ha explicado cómo hacerlo, todo eso.] Gente que ella conoce que son marroquíes.”* Hombre Marruecos Fase PRE  Relativo a situación administrativa y Tarjeta Sanitaria Individual (TSI)  *“Vinimos con el visado y resulta de que lo primero que hay que hacer al llegar aquí es poner en orden la tarjeta. Eso es lo primero.”* Hombre Bolivia Fase PRE  *“El proceso fue bien y lo ha solicitado en un centro de salud. [E. ¿Cuánto se le demoró, si fue fácil o difícil de hacer?] Fácil. [E. ¿Cuánto tiempo se le demoró?] 15 días.”* Hombre Marruecos Fase PRE  *“Hay que darles de alta, es lógico, hay que darle de alta en el ayuntamiento de tu pueblo o en el Registro Civil de Andalucía o lo que sea. Luego tienes que ir a un sitio, que no a cualquiera, concreto en función de tu domicilio que además no es fácil encontrar ese sitio para crear la tarjeta de la Seguridad Social, pero para ello tienes que aportar la tarjeta de la Seguridad Social de una persona que ya la tiene. Si tú no tienes, si yo no tengo tarjeta de la Seguridad Social, mi bebé tampoco… Claro porque el hijo va pegado a una tarjeta que está cotizando, a una persona que está cotizando, sino no tiene tarjeta. Habrá modalidades de hacerlo, no lo sé ahí. (…) Ya te insisto, seguramente no se queda sin tarjeta, pero así fácil no es.”* Mujer Rumanía Fase PRE  *“Que son ágiles los trámites, que son ágiles.”* Mujer Marruecos Fase PRE  *“Es que todo le decía a mi madre y mi madre me decía… que ha sacado... tal... o tienes que decir esto o esto. Ya ella sabe, yo le pregunto.”* Mujer Bolivia Fase PRE | Provisión de información  *“Traductor: Dice que, Pedro, que a través de las manifestaciones, ve la tele, ve toda lo que está pasando, pero él no tiene ninguna información, que sabe, esa reforma de salud, no tiene nada de información”* Hombre Marruecos Fase POST  *Traductor: (habla en árabe con XXX) Si de aquí, que estaba escuchando solamente de, de, de la tarjeta sanitaria que estaban diciendo que la gente que no tiene permiso de residencia no tiene derecho de acceso sanitario, y la gente que no está trabajando y no está cotizando en la seguridad social le quitan la tarjeta sanitaria, eso que está escuchando de aquí”.*  Hombre Marruecos Fase POST  Relativo a situación administrativa y Tarjeta Sanitaria Individual (TSI)  *“Pues si vas a quizá, pienso yo que cualquier cambio que podía hacer intervenido era al ir al servicio de urgencias por, insistir más en si tienes, si esta regularizada tu situación, en pedirte la tarjeta sanitaria, sin embargo eso siempre ha sido así. Es decir, no, puedo decir que no he notado tipo de cambio.”* Mujer Rumanía Fase POST  *“Pero normal ¿no?, me han atendido normal porque yo llevo ya, si ya un año que estoy, si exactamente un año que estoy, desempleada, y el rumor no, que se corría y además por las noticias y el rumor que se corre, esto de que, de que el que no esté aportando a la seguridad social no se va a ser atendido, pero sí, me han atendido muy bien, porque, además de que digo yo, la tenemos ahí a, nuestra amiga la trabajadora social .* Mujer Bolivia Fase POST  *“E: y la tarjeta de Salud ¿tienes?*  *Fanny: Si, pero ya no vale.*  *E: ¿Por qué?*  *Fanny: Porque si no tengo o no estoy asegurada no...”* Mujer Rumanía Fase POST |
| *Bloque 2: Acceso a los servicios sanitarios* | | |
| Entrada a los servicios | Entrada a los servicios: información y TSI  *“No, sin tarjeta no le atienden, seguro. Pero… este…. Pero sí le dan la tarjeta.”* Hombre Bolivia Fase PRE  *“[Traductor] Vale, dice que hasta ahora no tiene ningún problema; ella sabe que en urgencias atienden a toda la gente. Pero dice que la único la pega que le hacen es por la tarjeta sanitaria y cuando le dicen que no dice que no tiene nada que hacer, vuelve.”* Mujer Marruecos Fase PRE  *“(…) y tampoco en la recepción de estudiantes, nadie nos explicó, no nos dijeron qué podemos hacer en caso de tener enfermedades…También me imagino que tampoco uno sabía por dónde empezar, ¿no? Yo con la única información que tenía era con las personas que conocía aquí, que conocía que venían del mismo instituto que yo. Entonces, lo que me dijeron es que lo que haces es que te vas a urgencias.”* Mujer Rumanía Fase PRE  Volumen y distribución de los servicios  *“Ella lo único que conoce es el hospital. Y lo que le llevan al hospital le son conocidos su…la gente con quien vive.”* Mujer Marruecos Fase PRE  *“Más profesionales, se necesita más profesionales.”* Mujer Marruecos Fase PRE  *“Sí, o sea, hay de todo vamos. No necesito… ir a otro lado. Entonces lo tengo todo cerca… lo que es salud.”* Mujer Bolivia Fase PRE  *“Pues sí, la cercanía, porque como vivimos muy cerca yo lo veo muy bien. A parte del dinero no afecta mucho…”* Mujer Rumanía Fase PRE  Accesibilidad física a los servicios  *“Mmmm… sí, yo creo… bueno el lugar que vivo… de hecho me dista a los dos [hospitales] lados igual... al xxxx y aquí a la xxxx. [E. ¿está cerca?] Sí, de allá, en un coche digamos son 10-15 minutos, no es más. [E. ajá… ¿y para llegar andando?] No andando no, imposible. Tiene que ser en coche.”* Mujer Rumanía Fase PRE  Accesibilidad organizativa o entrada a los servicios  *“Que acuda al médico, ¿no? pues creo que facilita el hecho de que haya cita sin ir más lejos. Muchas veces no hay citas y tienes que ir a urgencias. Que haya cita sería un buen facilitador, ¿no?”* Mujer Rumanía Fase PRE  Horarios de atención  *“Pues los horarios, la verdad, me gustaría muchas veces que mi médico tuviera dos tardes porque era un par de tarde que yo descanso. Pero nunca puedo coincidir, que mi médico y yo coincidamos. Siempre tengo que ser atendida por alguien de urgencias o por alguien que no sea él. Entones eso me impide para ver a cualquier… o acceder a cualquier médico que yo quiera que me atienda.”* Mujer Bolivia Fase PRE  Tiempos de espera  *“Y otro motivo que es el tiempo de espera. Dice que ella cuando se va enferma y se pone a esperar tanto tiempo se pone más enferma.”* Mujer Marruecos Fase PRE  Pagos por consultas, medicinas o tratamientos  *“Sí. Ahora mismo, porque dicen que si uno no está trabajando no te dan lo… lo… lo que te dan, ¿no? ¿Cómo se llama? Ahí se fijan, si no estoy trabajando, o no esté trabajando mi señora, no te dan más baratos los… [E: Los medicamentos.] (…) No, eso, no me dan el descuento.”* Hombre Bolivia Fase PRE  *“Dice que no tiene papeles piensa que le van a cobrar.”* Hombre Rumanía Fase PRE  *“Pues la verdad se puede decir que son costes mayormente altos porque si quieres ser atendido temprano te tienes que ir de casa muchas veces sin desayunar. Y tienes que desayunar en la calle, y ya tienes que contar el desayuno también. Y el tiempo porque ese día no trabajas. Entonces, muchas veces en ese aspecto se te sale el dinero, sí, sí.”* Mujer Bolivia Fase PRE | Entrada a los servicios: información y TSI  *“E.: Vale. Mmm, ya me cuentas que tienes un poco, un poco los cambios respecto a los inmigrantes, ¿la fuentes de esta información ha sido solo prensa, prensa escrita, prensa televisiva? Alicia: Si, eh, en los medios digitales.”* Mujer Rumanía Fase POST  *“E: aja, aja... muy bien; ¿y que te cuentan, que te dicen más específicamente esas informaciones? R: no, solo lo que ponían en la tele, que se le va a recortar al... a la gente... a los inmigrantes que estén...”* Hombre Bolivia Fase POST  *“Ehhh... en la tele lo han dicho... en la tele han dicho la gente que sin documentación van a pagar la sanidad.”* Mujer Marruecos Fase POST  *“Exactamente. Que no nosotros tengamos que buscar la información sino que nos llegue, no sé porque vía pero que se nos facilite, quizá en el mismo médico, en los centros de salud, en los medios de comunicación o una campaña específica no lo sé, pero quizá tampoco les interesaba que se notase tanto, entonces si la información no es la suficiente, y tampoco, te, no sé, si se, relacionarla con el cambio político que ha sufrido España con la crisis económica con todo un poco, pero creo que está ahí en ese punto, ¿no?.*” Mujer Rumanía Fase POST  Volumen y distribución de los servicios  *“Dice que...el material de trabajo, las herramientas de trabajo ya...ya son menos...se notan que son menos que antes.”* Mujer Marruecos Fase POST  Horarios de atención  *“Pero... si... yo estado a alguna reunión en un centro de salud, he asistido; pero ahí se habla mucho... de... de los recortes de horario que están haciendo a muchos profesionales sanitarios (…) claro, la gente ya no puede recurrir... recurrir más tiempo... en... ¿no?... a esos servicios.”*  Hombre Bolivia Fase POST  *“R: Sí. porque también había otros casos de que, de que alguna le cobraron, porque se había fracturado, el tobillo*  *E: ¿Le cobraron?*  *E: ¿Pero a donde acudió a Urgencias?*  *R: A urgencias*  *E: ¿De Sevilla?*  *P: No de aquí. Del centro de salud.”* Mujer Bolivia Fase POST  Tiempos de espera  *“M: [Antes] Con menos tiempo de espera, sí.*  *E: Aja. ¿Desde cuándo crees que ha comenzado a hacerse más largo el tiempo de espera?*  *M: Pues ya peor es este año, ya más es peores porque eso estoy viendo con mi hija, mira que ella padece, tiene una enfermedad del oído, y tenían que hacerle una operación del oído, y no vea, desde el año pasado que la vio el médico en el mes de agosto, recién le ha vuelto la cita otra vez. (…)*  *Traductor: Que dice que por ejemplo, hoy esta malo pues tiene que coger cita pa su médico le dan a más lejos, dos días, tres días.”* Hombre Marruecos Fase POST  Pagos por consultas, medicinas o tratamientos  *“N: entonces me dijeron que tenía que pagar cincuenta euros y eso para... la atención*  *E: aja*  *N: entonces lo que hice fue volverme a casa y... mi pie a los tres días estaba más hinchado.”* Mujer Bolivia Fase POST |
| *Bloque 3: Factores relacionados con la condición o situación de las personas entrevistadas* | | |
| Factores que relacionan el acceso y las condiciones o situaciones en las que se encuentran las personas entrevistadas | Patrón de uso  *“Lo único que él conoce que cuando está, muy enfermo se va a urgencias del hospital y cuando está un poco, leve se va al centro de salud para pedir cita.”* Mujer Marruecos Fase PRE  Factores que relacionan el acceso y las condiciones o situaciones en las que se encuentran las personas entrevistadas  *“No quiere operar porque todavía no tiene dineros para los gastos.” “Cuando una persona no está trabajando le viene bien por el tema del horario pero por tema económico no.”* Mujer Marruecos Fase PRE  *“Por su experiencia, lo ha conseguido saber por su experiencia, porque ha estado en sitios en delegación de salud, en el centro de salud leyendo carteles colgados y todo. Y en Marruecos ha recibido clases de la medicina y los derechos y eso. Por ejemplo, cuando estuvieron aquí recibiendo clases de español, los profesionales le intentan dar información, por ejemplo, estuvieron haciendo información sobre la prueba de citología, sobre el cáncer de mamas, sobre los cuidados del recién nacido. Que cuando estaban recibiendo clases de español si recibieron clases de información sanitaria, pero cuando han quitado las clases de español, ya han quitado todo.”* Mujer Marruecos Fase PRE  *“Sí. Ahora mismo, porque dicen que si uno no está trabajando no te dan lo… lo… lo que te dan, ¿no? ¿Cómo se llama? Ahí se fijan, si no estoy trabajando, o no esté trabajando mi señora, no te dan más baratos los… [E: Los medicamentos.] (…) No, eso, no me dan el descuento.”* Hombre Bolivia Fase PRE  *“A mí me vienen mal por el tema del trabajo. Y… sí, bueno, están por la mañana y por la tarde pero por la tarde hay pocos médicos que van por la tarde. Van a lo mejor una tarde o dos veces…”* Mujer Rumanía Fase PRE  Percepción de discriminación en el entorno del sistema de salud  *“Pues veo que es una discriminación. Eso sí es discriminación. Porque si bien es cierto que están cotizando los demás y nos están atendiendo a los que no tenemos documentos. (…) Por ejemplo, yo he tenido mi carta de expulsión, y pues he tenido… está en proceso de juicio… y eso. Y gracias a Dios lo logré y entonces todo eso, yo se lo he dicho. Yo he tenido ese problema por carta de expulsión por indocumentada. Lo siento, que no tengo los documentos. Yo cuando lo tenga lo voy a cotizar. Entonces por arraigo yo lo he sacado y gracias a Dios, lo he sacado.”* Mujer Bolivia Fase PRE | Miedos y percepciones de dificultad de acceso  *Traductor: Conoce varia gente que le han denegado, conoce a un amigo de él, que ha tenido su mujer, él no está trabajando, su mujer no ha podido renovar la tarjeta de residencia y a raíz de eso le piden seis nóminas,(…) le piden un contrato de trabajo de trabajo de un año, le piden un certificado de empadronamiento, le piden una casa en condiciones, le piden muchas cosas que él no tiene la posibilidad porque no está trabajando estamos en crisis, entonces ha tenido que devolver a sus hijos y su mujer a Marruecos, él conoce varia gente que han devolver, que han vuelto a Marruecos, por culpa de eso”* Hombre Marruecos Fase POST  *“… porque… yo te puedo hablar de mi experiencia, como persona de afuera, como extranjera; cuando te encuentras con tanto estrés, con tanta dificultad, cuando los profesionales ellos mismos tienen la presión y... y... y... están… pues… pues con una carga con un peso ¿no? porque el trabajo pues... se hace de otra manera, no te sientes con ganas de acercarte… no sientes ánimo, no tienes la confianza para acercarte y para...para pedir la atención sanitaria.”* Mujer Rumanía Fase POST  *“Exactamente. El hecho de ahora ya no tengan derecho es una barrera más todavía; ya tenían de por si barrera por la falta de conocimiento, falta de información, y ahora la barrera es doble porque una vez que tengan conocimiento, si lo que les van a decir es que no tienen derecho...”* Mujer Rumanía Fase POST  Factores que relacionan el acceso y las condiciones o situaciones en las que se encuentran las personas entrevistadas  *Traductor: Me está diciendo Marco que por el tema de la crisis ya se cambió muchas cosas ahora, que hay que pagar las medicaciones, muchas cosas hay que pagar, y que se está notando cambios.”* Mujer Marruecos Fase POST  *“ Que no quieren, que no podían atender que tenía que venir aquí a mi médico de cabecera, y, y, y por todo eso es que yo más he acudido ya a estos productos naturales por todo eso, porque es que no, no hay un auxilio rápido, no hay atención de emergencia, rápido, entonces, yo fui con mis pies hinchados todo mal, y trabajando yo ahí en xxx, yo creo que tenía todo el derecho, (…) me ha reñido un montón todavía, me ha reclamado lo mismo…”* Mujer Bolivia Fase POST  *“Que… qué bien, porque… muchas ve... como no sabe la lengua española pues tiene amigas que le van con ella y le ayudan a traducir en el centro de salud.”* Mujer Marruecos Fase POST  Percepción de discriminación en el entorno del sistema de salud  *“Ya ma... ehh... que... ha notado la discriminación en urgencias; que muchas veces le... le dejan a ellos esperar porque son marroquís y pasan a los españoles, (me está comentando en sus palabras).”* Mujer Marruecos Fase POST |

*Explicación del código de entrevista: sexo de la persona (hombre o mujer); nacionalidad de origen: Rumanía, Marruecos, Bolivia; Fase de entrevista en relación con la aplicación del RDL 16/2012 (PRE/POST).
